# Supplementary material for: Metabolomics approaches in pancreatic adenocarcinoma: tumor metabolism profiling predicts clinical outcome of patients
Source: BMC Med. 2017 Mar 16;15:56. doi: 10.1186/s12916-017-0810-z (PMC5353864; doi:10.1186/s12916-017-0810-z)
Supplement: Additional file 1: — Values of metabolites'quantification. (XLSX 80 kb) [file 12916_2017_810_MOESM1_ESM.xlsx]

## Sheet: PP
Patients	neoadjuvant CT	Ascorbate	Aspartate	Choline	Creatine	Ethanolamine	Glutamate	Glycerol	Glycine	Gpcho	Lactate	Pcho	Taurine	Threonine	Glutamine	Succinate	Glucose
0006-TS_4_1	WITHOUT	0.5351193128	0.4533954514	0.9241778198	1.6500423530	0.3504317556	2.6531525594	5.3030069205	3.4356020563	2.7101060990	9.8121810862	2.0712434280	1.5656581492	1.1384291764	0.8104118785	0.3548539630	0.8881129668
0018-TS_4_1	WITHOUT	0.6131047231	0.6055974138	1.5206812082	1.0967566679	0.7293966089	4.1180222313	11.2723751768	6.8366987986	7.5369796282	11.1217903092	1.9801921442	2.3448474827	1.4823003432	1.0817441788	0.4554839259	2.2125637514
0022-TS_4_1	WITHOUT	0.1083369767	0.5927444885	1.3282475889	2.4562460095	0.8186179570	1.7792865798	2.9743281314	2.1457313419	0.4069772595	14.4320560077	0.5025291133	1.6672179297	0.7953701925	0.4338242315	0.0938612471	0.41506831
0032-TS_4_1	WITHOUT	0.2404770513	0.7076765841	1.8855784505	1.8137280362	0.8007700075	3.7556430882	17.2041731723	13.4857879766	1.9325535656	11.5734914234	1.8049608837	1.8140810753	1.3421592586	0.7195223474	0.5833831756	0.8339648202
0040-TS_4_1	WITHOUT	0.7119914988	1.1984056124	2.3400037641	0.8369190964	1.1503549726	4.2504805300	2.4368710027	2.3764981178	0.8625365036	8.6340028057	0.9211940066	7.8212069664	1.1709951166	0.4700673911	0.1400763931	0.9653075842
0046-TS_4_1	WITHOUT	0.2070026908	0.5479323385	0.6482430264	0.9411808033	0.7384295600	2.3827349007	3.1034705059	3.1199537887	0.7216643723	9.3035168179	0.8117841959	3.4923893473	0.8573324853	0.4950495769	0.1512093320	0.7881655541
0056-TS_4_1	WITHOUT	0.1953851813	0.5281285931	1.1559259634	0.7216884587	0.6715573499	2.2096675694	5.7090619675	4.7947226732	0.4703649906	7.8391955899	0.4549544536	2.6753041126	0.7002660546	0.3880657346	0.1478422511	1.3935653643
0071-TS_4_1	WITHOUT	0.3637823894	1.4105091360	1.9821786422	3.5146967231	1.1958567565	2.9094670142	22.9136215000	15.8118193027	6.0347516635	11.2078274859	1.2932130969	1.8717399741	1.1568437872	0.9838067351	0.6541082344	1.3942983991
0104-TS_4_1	WITHOUT	0.1636723742	0.7749681969	2.2366732226	2.6027655601	1.9268747404	2.7846717675	2.7370614264	2.8231637832	1.1172749543	15.1102986984	0.6813553326	3.4380152146	1.4382392703	0.7868186006	0.1810779626	2.1308441159
0024-TS_4_1	WITH	0.3352948903	0.4994146958	3.4462026329	2.2263230730	1.8975176615	2.8598402637	4.5144249557	4.0216508415	0.9610076741	12.0528305806	0.8407304743	3.8538606529	1.4301188556	0.3930523120	0.1669682816	0.6416484726
0038-TS_4_1	WITH	0.1742065753	0.9062020193	1.8052565459	2.6076348464	1.4867969254	2.8864319970	3.4013278815	3.4094987045	0.8350847044	8.1290275757	0.6837411048	2.3101683765	1.5429847521	0.5569498261	0.1046473818	0.4848974718
0050-TS_4_1	WITH	0.7023857505	0.6228783167	1.5263956344	1.2104486032	1.1487646110	3.0557461807	1.8404723650	2.7801639882	0.6790693809	11.0392202960	0.5436595184	5.0170818093	0.9334157697	0.5089907735	0.1877189942	1.4555742918
0054-TS_4_1	WITH	0.2429514989	0.6565979645	0.9647597508	1.1990908647	0.8531616153	2.2723538901	8.6649285708	7.8173050009	0.5017653394	11.9685057751	0.5164462683	2.9738732413	0.8768482546	0.5279580188	0.1191855494	1.7339763162
0069-TS_4_1	WITH	0.2158823641	0.8696181878	1.3571169425	1.9590331324	0.7432799485	2.6456795558	25.1931300402	20.2359222461	6.6460612730	7.4655050267	1.3271242654	1.1336089867	1.0525195504	0.5985269952	0.3536734518	0.6684192607
0073-TS_4_1	WITH	0.4384452919	0.8134194502	2.1480563913	1.2874259242	1.7318339846	3.6469961551	9.4001542338	4.7642172589	1.6344829482	11.4669881615	0.9422083901	2.7219070399	1.4839922747	0.6653330213	0.2785505721	0.7894333124
0094-TS_4_1	WITH	0.4084099639	0.4060551793	1.3529014652	2.6312951908	0.4239510880	2.6077856145	6.4898631272	3.8846887916	4.2611873519	6.8947829623	1.4443212668	1.0822550446	1.1494239447	0.8461885178	0.5094464422	0.3575200079
0096-TS_4_1	WITH	0.3400854870	0.6094631103	1.5187832069	1.0832962706	0.6340948674	2.4258180213	6.8857751212	5.5615998160	2.2480735165	8.3952915714	1.2772893067	2.5578101082	0.8734762287	0.4094931747	0.3561479402	2.4571233567

## Sheet: PA
Patients	neoadjuvant CT	Ascorbate	Aspartate	Choline	Creatine	Ethanolamine	Glutamate	Glycerol	Glycine	Gpcho	Lactate	Pcho	Taurine	Threonine	Glutamine	Succinate	Glucose
0003-T_4_1	WITHOUT	0.4273856595	0.6836126582	0.6629606184	1.1343629038	0.2962516513	3.4206252034	2.4214244894	1.9857514389	1.2375238140	12.0174605713	1.1854662103	7.8050191827	1.3640957704	0.6293391360	0.1891292244	5.6368959375
0005-T_4_1	WITHOUT	0.3980380156	0.4421106457	0.3094877760	0.8883703383	0.2517465531	1.8430526830	2.2922133980	1.9271948708	0.8014237128	18.9713050495	0.8164375101	5.5828305557	0.9305086303	0.4533161512	0.0930108679	3.0743069507
0009-T_4_1	WITHOUT	0.3869811958	0.8684362589	0.9105375572	1.0947441429	0.4511317828	2.9801943012	4.0582159936	3.4865243114	0.9047516593	13.5888774819	0.7667456240	3.3172995394	0.9396904377	0.6567867642	0.2651696099	1.1921377009
0017-T_4_1	WITHOUT	0.6743295357	0.5786363918	0.6304019995	1.6232684155	0.3835813048	2.3823277052	3.2316292216	2.8057074240	1.7087484811	18.6429997961	1.2894618308	5.9895001985	1.6668742329	0.9625282972	0.1703419190	2.0110287715
0019-T_4_1	WITHOUT	0.5078426563	0.7686528314	0.8865430367	1.3687352053	0.6679026025	2.9955330630	2.6712871171	1.8530464473	1.0972765410	15.0422702501	0.8816354177	6.1010860799	1.2906043110	0.6606410084	0.1534957099	1.1526559487
0021-T_4_1	WITHOUT	0.3276608080	0.7426497842	0.6825840251	1.6419895957	0.6870637079	2.9670908257	3.0126427566	2.4051692398	1.2251198824	22.5140722940	1.5163092953	3.9495660170	1.6510857714	0.7879370976	0.1945823115	1.0468040342
0025-T_4_1	WITHOUT	0.7966246799	0.7087495368	0.6747556076	1.2612162612	0.4080556273	3.0095748352	4.0984009720	2.0952274115	1.0923114288	16.5379234110	1.0849279848	6.3949653973	1.4557490113	0.8577848417	0.2252992472	1.0580689977
0027-T_4_1	WITHOUT	0.5052269984	1.0947991215	0.6067836286	1.1004770784	0.4094178828	2.5933959254	4.2834030884	3.3977252532	0.9578693417	12.6280193754	1.0675296699	6.9097218888	1.3609116229	0.6652316792	0.2243960634	4.7342358744
0031-T_4_1	WITHOUT	0.2283887700	0.5820884023	1.3441858427	2.0451738551	0.6775310198	3.5935519515	1.7210215960	1.9084337261	0.7763074389	13.3104261316	0.8996423840	4.2087676431	1.2742354211	0.5164323190	0.0998029109	0.5627972109
0033-T_4_1	WITHOUT	0.6448652698	0.8461555973	1.4980803370	1.9263583471	0.7768396892	2.9278752326	3.9852441671	2.7713842145	1.2340268238	18.2709120968	1.1931311082	6.6006164599	1.5554644913	0.6921286162	0.1386253524	0.7871886858
0039-T_4_1	WITHOUT	0.7255940569	0.8075798527	2.5083916291	2.6493917583	0.8937353134	3.6739177977	3.3125696334	2.9681390520	2.2755417873	17.5262348913	3.0824610023	5.0159502246	2.1293378200	1.1869027493	0.3602415475	1.0134345366
0042-T_4_1	WITHOUT	1.0594687157	1.2398878926	1.2506923803	1.8494204508	0.7638084529	5.1310482544	3.2297276387	3.1320431320	2.1723336061	19.9721641373	2.1580097276	6.2984986816	2.2365788579	0.9607110068	0.2499529552	1.3046186173
0044-T_4_1	WITHOUT	0.5125853197	0.7785251901	0.6758729920	1.4840450562	0.4798592609	2.4300598583	2.4523888929	2.4518210850	0.9467989282	14.9804494960	1.4054992977	4.0296713476	1.5753106385	0.9869963955	0.2081657608	1.0800938351
0045-T_4_1	WITHOUT	0.4394198668	0.6485057794	0.7577070054	0.9851780880	0.4014653617	2.5733939929	3.2623862032	2.1851763319	1.4866119995	14.1214393180	1.1216193385	3.5090356315	1.3006345714	0.4768745750	0.1530621383	0.5629874901
0055-T_4_1	WITHOUT	0.3176404650	0.4774434201	1.1275000409	1.2354374254	0.3485309461	2.3217791621	2.1037685869	1.8253125872	2.1353555732	12.9725108134	0.7528227504	2.7995463709	1.1815505606	0.7308798616	0.1583507038	0.5890763424
0061-T_4_1	WITHOUT	0.5338859804	1.1494955413	1.0937764978	1.7749206413	0.8850121938	3.1850155873	2.3752607808	2.4912482889	1.5496130235	20.6503146822	1.1273083923	3.4960849384	1.6006155291	0.9339510090	0.1735142323	1.5163576614
0062-T_4_1	WITHOUT	0.3496426143	0.5445268773	0.6666914545	1.0175868737	0.3357930838	1.9931169629	2.0665407886	2.3084422355	0.7640731120	16.8127338771	0.9089795509	3.8941106965	1.0259824566	0.6709549231	0.1213038456	0.6202015529
0068-T_4_1	WITHOUT	0.7152263242	0.9681995355	0.8996709321	1.9090335056	0.6149211509	2.7743346196	3.8189480200	3.0242187355	1.6227175130	23.8472487185	1.7432198274	5.0888746206	2.0455499680	1.1407344096	0.1564102836	1.4332818612
0081-T_4_1	WITHOUT	0.5516457277	0.5703295612	0.7280289084	1.1324643491	0.5560720367	2.1013981909	3.0782930532	1.9918108396	0.7807756367	11.4681109684	0.7314510920	4.3468784162	0.7960537450	0.5776356882	0.2167554560	1.525003974
0084-T_4_1	WITHOUT	0.1269834716	0.5097110048	0.9370832318	1.2156913960	0.5341837837	1.6967805119	2.5505985436	1.8241873990	0.6282215945	18.0185731252	0.8237148618	4.0915871119	0.9228028895	0.3994375210	0.0944812876	0.8617206603
0086-T_4_1	WITHOUT	0.2129914816	0.4934621646	1.0106773915	0.8649894712	1.0135790150	2.3336006869	2.2022066061	1.5516031646	0.6932485744	16.7426956466	0.6483712579	4.6569984604	1.0320638909	0.5941558913	0.1672774564	0.5677080194
0088-T_4_1	WITHOUT	0.1890777935	0.3847873390	0.6705504524	1.3611895844	0.5785466630	2.0585943829	1.7899112822	1.6100349906	0.5370078388	15.5819343919	0.5294675791	3.5379110839	0.8039380780	0.6180253964	0.2063429726	0.6019444381
0090-T_4_1	WITHOUT	0.4277875089	0.5649251817	0.8477337681	1.2831037779	0.8917101987	2.6268460811	2.4195499682	1.8068790545	0.9659371603	19.6749898448	1.0296596973	7.1838695556	1.3491965435	0.7992991099	0.2429554968	0.6525830596
0091-T_4_1	WITHOUT	0.4265596941	0.4962537203	0.7192141460	0.9436619535	0.5567204970	1.9399700265	1.8665580555	1.5540579152	0.7227192605	15.4608386643	0.7321289939	4.0085224831	1.0563710737	0.4782410978	0.1550861838	0.8746958413
0097-T_4_1	WITHOUT	0.2871802525	0.3950298527	0.8081171943	1.0036756234	0.6921472759	1.6431845590	2.9176415658	2.5700751401	0.8349094176	11.0081459914	0.6684649426	2.9824752866	0.9500975519	0.3470213714	0.1332730966	1.5082309469
0103-T_4_1	WITHOUT	0.2635053401	0.6368349026	0.9297630756	1.5906031847	0.7298813929	2.2971040571	3.0931472379	2.5920437137	0.9215525320	13.0375128595	1.0974970276	2.9195899651	0.9408918441	0.5724820230	0.2694233211	0.9396006946
0105-T_4_1	WITHOUT	0.1344168748	0.6412825716	0.5362903389	0.8785656933	0.5186609832	1.8024427747	1.6698852285	1.3697205080	0.2584975268	12.3032431415	0.3197729924	3.1094461533	0.5365608660	0.3488414443	0.0459971816	1.4464654331
0113-T_4_1	WITHOUT	0.3190823124	0.6907513567	1.0058011241	2.8338738608	0.9880456322	2.8218323692	5.5670320718	4.7024581285	1.3241947654	32.6408673493	1.3523094245	4.6852887455	1.7685330544	0.6830199003	0.2931281330	3.5686140193
0115-T-_4_1	WITHOUT	0.3943012431	0.5867389622	0.6502781206	0.6883563276	0.6654073995	1.7916250692	2.3001325319	2.0516029427	0.6699777740	13.3857544672	0.5872454383	4.2649871974	0.8097003995	0.4893360099	0.0943860834	0.8404585219
0117-T-_4_1	WITHOUT	0.2306212687	0.3181501045	0.8646078647	1.6116659820	1.1469553448	1.2057717960	1.7398042010	1.3043278279	0.8299398467	21.3450241872	0.7210259617	3.2885133415	0.9203272223	0.4262718870	0.1308486727	0.7193384375
0122-T_4_1	WITHOUT	0.3700112295	0.4675380620	0.5257547047	1.2602778795	0.9734335355	2.6471464311	3.5770894473	2.9653040463	0.9692517095	24.1546800506	0.8453366671	5.0301807010	1.2145758530	0.4898242071	0.3908834965	2.3433656154
0126-T_4_1	WITHOUT	0.2115934035	0.8408080050	1.6580980855	2.6215423919	1.1440977562	3.3594727694	5.9249955447	3.6859360785	0.4953243847	16.3992754526	0.6450542061	4.7961514067	1.1811717606	0.9319308897	0.2589180636	0.8371652689
0138-T_4_1	WITHOUT	0.0784159848	0.4483279654	1.0837798589	1.1299510649	0.8281829617	1.8075394643	1.7999123964	1.7795739188	0.3195018846	13.0610814587	0.2650125180	1.5797231766	0.7395730980	0.1777579099	0.0395520130	0.180472609
0140-T_4_1	WITHOUT	0.2522700396	0.5960721287	1.2588946882	1.3771116579	1.0997365864	2.6912688912	3.3257013153	3.0481414112	0.7818572253	14.1857022936	0.6821672817	3.3472047113	1.1535702031	0.5605654991	0.1117168433	0.4500728965
0142-T_4_1	WITHOUT	0.4228956475	0.5363684800	1.1145627707	1.3308721130	0.7894974791	2.7240736239	5.1033318634	4.1906371203	2.1113210649	11.0569164940	1.2465475192	2.3832750056	1.4428176076	0.7932518368	0.3016077093	2.0280443297
0153-T_4_1	WITHOUT	0.6033331411	0.7405043240	1.0494513902	1.4357216375	0.7271750063	2.3306060253	3.6700842508	2.8033722331	1.3837983613	23.7771668095	1.2573178320	5.8236297267	1.5564109461	0.6508458666	0.1469158672	1.0902759206
0155-T_4_1	WITHOUT	0.2391322861	0.4862240581	0.6552628139	1.2985370355	0.4567637626	1.9724869825	1.9742598406	1.4579097504	1.1232334106	16.4456476336	0.6951471666	4.3811772189	0.9403155656	0.4827103573	0.1417376155	0.9073606485
0159-T_4_1	WITHOUT	0.2261113284	0.3900842701	0.5408178883	0.8163435760	0.2051863198	2.0864229865	1.2413371543	1.1710618014	0.6245084124	9.0824713932	0.6636841324	3.1819039263	0.7426132716	0.5994737961	0.1453977770	1.6385592101
0165-T_4_1	WITHOUT	0.8900435068	0.7810563761	1.0254570075	1.3422829536	0.5964687425	3.4527437744	2.4052774643	2.1373793539	1.2171335811	17.2461910625	1.2716256929	6.3413081033	1.3812532621	0.7840413684	0.1542141060	1.036463747
0166-T_4_1	WITHOUT	0.0540933761	0.3150182443	0.3747443459	0.7981633621	0.3026838135	1.3221722450	0.9842715325	0.8042265093	0.4163965967	15.0285842636	0.4974152619	3.8036549536	0.4471826842	0.6634821662	0.1503677378	1.0336285268
0167-T_4_1	WITHOUT	0.1327973396	0.3153842049	0.9580136457	0.8913427999	0.3982283236	1.2809453006	1.4752178569	1.1988249915	0.5247757832	11.2428329437	0.6157563972	3.1363280377	0.6145464015	0.2368669437	0.1344370363	0.388022128
0176-T_4_1	WITHOUT	0.3150238036	0.3837403271	0.6012374489	0.7243573722	0.3117688627	1.4467037031	0	1.2357303518	0.5494209372	10.0253458580	0.5289490083	4.1429731023	0.7576951626	0.4960719817	0.0796224146	0.3167255082
0240-T_4_1	WITHOUT	0.2383847980	0.2647577293	0.3097048564	0.8871492681	0.1715147409	1.7393165391	1.3877912041	1.0232582665	0.6985502898	9.1015291660	0.5281665715	3.8842972170	0.6594754234	0.3219108152	0.1373556550	0.7741448911
0001-T_4_1	WITH	0.1854995882	0.4310225589	0.4900526826	1.4500714534	0.2600160426	1.5761641679	2.3524531925	1.7287067816	1.3830807271	16.2718326976	0.9592228290	5.2848689430	1.0074410147	0.3969759395	0.0719123141	1.0445307641
0008-T_4_1	WITH	0.5424768319	0.8264496168	0.6371200213	1.4697888855	0.4337092622	3.0109901795	3.2716309041	2.6698882988	2.1763898525	21.5648339147	1.5996494361	4.9832136495	1.8492890686	1.0316946281	0.1228659647	2.2111952751
0010-T_4_1	WITH	0.3513580464	0.8979840275	0.9988135318	1.4336742121	0.7204686525	2.9438011739	2.4864914765	2.3624834401	1.1179823958	15.5321670095	1.2815534196	4.5395148372	1.6215811830	0.7631475089	0.2159861062	1.7662316334
0012-T_4_1	WITH	0.7712451144	1.0166022360	1.0041043174	1.5426223417	0.5738985954	3.6382486308	3.4979609729	3.2080920374	2.5295413963	19.0302464332	1.3868153900	6.6031357348	2.1044229113	0.7314965726	0.1568476872	1.5081944588
0014-T_4_1	WITH	0.6548999651	2.1702688067	0.9928333905	2.3083203156	1.0367177724	4.4027951423	2.8186580304	3.0008875669	1.5305316780	12.7826755756	1.2767492305	4.6024829585	2.0384589660	0.9879323745	0.1657652861	5.1214351797
0016-T_4_1	WITH	0.2801211754	0.9847632986	0.4041218229	1.0505313862	0.2974449096	3.0405892962	3.8238342696	3.5229524236	0.7716518741	12.8323492569	0.5159523997	3.3165731415	0.8990165348	0.7906195758	0.1692525135	5.4094217968
0023-T_4_1	WITH	0.5180529512	1.3390744241	0.9800528044	1.5857442880	0.8972184025	3.5861900325	2.5140915917	2.5025577192	1.1393076843	17.2524963966	0.8686121908	6.5697134057	1.6827775337	0.8910941769	0.1181775378	2.8764884851
0029-T_4_1	WITH	0.5018245740	0.6178489594	0.5244078827	1.6851785610	0.4027415380	2.4017468965	1.9780650541	2.2592390295	1.5721392732	21.2358782684	1.4360766035	4.8998715997	1.9264866249	0.8436741394	0.1533803885	1.8980414889
0035-T_4_1	WITH	0.7225733138	2.0455048314	0.5894726960	1.5297203822	0.6369983911	3.9372060160	4.2046987405	4.2552660948	1.9991775901	16.5032581735	0.9581221761	4.2349111880	1.3819985196	1.0543291131	0.2190103282	6.9991147508
0041-T_4_1	WITH	0.5839852674	0.7703005103	0.9767939306	1.6758362870	0.4466091375	2.8099379916	2.2926934433	2.4702406680	1.2804855565	11.7462400389	1.0600147585	3.7226205796	1.5575879028	0.7282931104	0.1086951215	1.3418295866
0047-T_4_1	WITH	0.1630574750	0.9336479858	1.2316946314	1.3526759014	1.5201720881	3.1768562447	6.0212863656	5.5945959198	0.9690052207	18.7180802756	0.7143714960	4.0190691781	1.3565509122	0.8648328380	0.2199988878	3.2247574147
0049-T_4_1	WITH	0.3237849091	0.6313196835	0.9689391570	1.5101268763	0.7756572251	2.8843224352	2.4280936076	2.5106713882	1.2114671390	19.1180361897	1.0809401306	5.4255146839	1.6453370530	0.7521155955	0.1206729160	0.5692839821
0051-T_4_1	WITH	0.0031737654	1.4147850040	0.2759380753	0.3891377018	-0.0495604586	2.6764663885	1.1368702095	0.9319330975	0.7928565645	12.5359272319	0.0210604249	1.2960200483	0.2376765181	0.5265616921	0.1271233953	17.2497348979
0053-T_4_1	WITH	0.6156789809	0.7906674101	0.8240055038	1.5679967066	0.8993810592	3.0123423768	3.9224573561	4.1338345766	1.2508492335	20.7870463892	1.0623059579	7.1096265038	1.7002142586	0.7570826754	0.1571766367	0.8374640472
0057-T_4_1	WITH	0.3336279616	0.5653583745	0.5600268158	0.8897189886	0.4133905384	1.6880903398	3.2238153042	2.9280373740	0.9117240909	19.2346943714	0.6361800320	3.5424611237	0.9360778020	0.5838064538	0.1919177532	1.4206984265
0059-T_4_1	WITH	0.4280230558	0.8511646272	0.7779629704	1.4188918598	0.5969992468	2.4134832704	2.5148972564	2.2975947106	1.0726135693	16.1775353841	0.9561075309	4.0286139620	1.4048723646	0.6546875943	0.2285446289	1.5290267319
0064-T_4_1	WITH	0.4694328913	1.0318069815	1.5871564763	1.7668170235	0.9697977453	4.5884773303	3.5392663529	3.8299846917	1.3561060631	16.5459417295	1.2735807868	3.9068763362	1.9315116595	0.6708778532	0.1751119396	0.5675117554
0065-T_4_1	WITH	0.7068942504	1.6139547436	1.8103251085	2.6315681170	0.9851588548	5.4204164784	5.1427316085	5.2220094854	3.2062907503	32.5591336252	3.0186488735	7.3817288624	3.6677080772	1.9113429065	0.2511827380	3.6959973293
0067-T_4_1	WITH	0.1930876227	0.5012889345	1.2291230025	0.8349109266	1.0588116374	2.0774799054	5.6213358640	3.8124527804	0.7389991952	16.4955178629	0.6882198244	3.8948840745	0.9974221366	0.6567731324	0.1873018257	0.6319275158
0070-T_4_1	WITH	0.6562643353	0.6271295312	0.7583373030	1.0680406714	0.3416420518	2.2656874528	3.0724962196	2.7776027889	1.1351693491	15.2543888405	1.0598450590	6.0531054688	1.2317329774	0.5188594059	0.2151157506	2.0849947281
0072-T_4_1	WITH	0.4686595326	0.7761051559	0.7375257277	2.8500389023	0.7232037328	2.7199933928	3.3443685722	3.0380746974	1.8086117385	23.6132863455	1.5015199992	6.9880205048	1.9205589252	0.6819705487	0.1905538640	2.7620635467
0076-T_4_1	WITH	0.0685167341	2.1132215672	1.4764722626	0.6484004298	1.0524026356	2.9910547581	4.6202641479	4.3481594859	0.2811095488	8.9137284413	0.3372671408	3.5184794814	0.4329547429	0.6619382473	0.1467034319	4.2686872977
0078-T_4_1	WITH	0.7980478121	0.6377141752	0.9784873314	1.4729936546	0.5206485376	2.6190918057	1.9781265921	1.4448446367	1.6592326144	19.0930457358	1.6178946563	6.1909587053	1.8815495937	0.8441951683	0.1303512509	1.2648413722
0079-T_4_1	WITH	0.4394105260	0.6232876675	0.6271204664	1.7412427373	0.6722489413	2.5533638234	2.4784070694	1.8808187825	1.0690600716	25.2000434136	1.2153560940	5.6287998829	1.5752360615	0.5881914806	0.2031701682	1.1236111448
0080-T_4_1	WITH	0.1822426744	1.0990410468	1.4019657608	1.3688212441	1.4360193824	3.0875464516	3.4603045791	2.7719686502	0.7346567296	17.2330545949	0.5707211427	4.2262494986	1.0208676428	0.6618248105	0.1920777979	1.3385186661
0082-T_4_1	WITH	0.8738277918	0.6010620596	1.3668285071	1.4828418527	0.7217803621	3.2009056360	3.8590275471	2.5953529375	2.1985939951	14.5636919114	1.4379962639	3.7853222537	1.5032853768	0.7143513650	0.4764540797	0.7661634995
0085-T_4_1	WITH	0.3769218814	0.6627528833	0.9545528077	1.6971078571	0.4593264643	2.2191431902	4.5493757480	2.3807983955	1.3286494048	23.5469901886	1.7396301802	4.0155424701	1.3904643697	0.8508396485	0.3188676406	1.6180437036
0087-T_4_1	WITH	0.5324248027	0.6189977062	2.9573498407	2.9758409882	1.8053511163	1.7991135049	3.7185671009	2.8236226986	1.0685029417	14.1384098065	1.3279516684	6.6786879978	1.4517744752	0.5859819229	0.1721582217	0.4630222572
0092-T_4_1	WITH	1.0059126228	2.7373617312	1.0624159612	2.1487864633	1.3679538998	3.7481262347	6.1289514494	4.9497435419	1.0565443499	12.4513192980	1.2472907663	4.0563355932	1.7057135982	0.4235449953	0.2078300115	6.536558006
0093-T_4_1	WITH	0.4031951490	0.6462906000	0.8462064919	2.1945866822	0.4723858307	2.7841187445	1.7901549399	1.3627446630	0.8054002680	9.7943444068	0.7432024899	4.2312600782	0.9517109953	0.6576585645	0.2023442128	0.6676837481
0095-T_4_1	WITH	0.3692105567	0.4176984308	0.9970266025	1.2685392902	0.5860704656	2.2938583279	2.0108919501	1.4218928651	0.7434795821	12.0014287771	0.7301293681	4.2993769749	0.8699187988	0.4261782589	0.1783710790	0.5764063403
0099-T_4_1	WITH	0.1349223447	0.5532951978	0.7024496373	1.0861515374	0.7617525365	2.2318972331	2.1859241504	1.8364038820	0.7844297345	22.9123946914	0.9442977212	5.7719266521	1.1696773521	0.4701800721	0.0608896585	1.5235313915
0100-T_4_1	WITH	0.0824746723	1.8153258935	1.3808009239	0.9432010366	0.7232683250	3.6411853501	18.4041279998	12.5073640616	0.4698846199	6.6812139244	0.4834960975	1.1387067583	0.2431778426	0.3763075324	0.4393840887	7.6033428768
0101-T_4_1	WITH	0.4321356833	0.7164133458	0.8544514937	1.0783593610	0.5330328673	2.0773364855	2.4677041772	2.0294353668	0.6005256573	10.4129357416	0.5669619920	4.8480935243	0.8642415777	0.4403418090	0.1115790826	3.1991288157
0107-T_4_1	WITH	0.1734786608	0.4694465558	0.5316307067	0.7548194487	0.4153585453	1.3902605846	2.9846980096	2.8934725195	0.5222491454	8.7936145828	0.5284628490	2.3632291301	0.6104744041	0.5840859174	0.1549912678	0.8674417617
0109-T_4_1	WITH	0.4295162740	0.6923023195	1.4993069320	1.6610430992	0.8395344152	3.0940070611	3.9273622014	3.5028818180	0.9456803251	9.0775931107	0.9253002112	2.8077070849	1.2705427435	0.5380580747	0.1866746125	0.3023706049
0111-T_4_1	WITH	0.4397941215	0.4106295789	0.8592578127	1.3102701154	0.7415723909	1.7636826160	2.0981944867	1.7542431483	0.7346446246	19.6927793350	0.8786780420	4.0373170463	0.9949369913	0.5131616111	0.1946443718	1.1325649684
0119-T_4_1	WITH	1.0079236557	2.2908517905	1.9082659105	3.5345055550	1.8292364245	6.4736900356	11.8675623391	8.5554456215	4.8202167757	18.9788856917	2.2831961675	3.7057638227	4.2229877053	1.1734497073	0.1459630031	1.300169605
0121-T_4_1	WITH	0.2607288669	2.2383153361	1.5218647154	0.9711013778	1.4032712247	3.3431883475	6.9485256049	5.6489975113	0.0515355761	7.9162218583	0.4379409239	2.1507744085	0.5527005324	0.7738587761	0.2716211975	4.8472404431
0124-T_4_1	WITH	0.3251392722	0.4635612078	1.3327324755	1.3686456309	1.0442309292	1.9903880179	3.3172947308	2.4663481111	0.8088133967	14.7687234469	0.7647428483	3.1277719226	1.1613667465	0.4274742845	0.1332828129	0.6250918665
0127-T_4_1	WITH	0.0632380225	1.7215574049	0.8753599661	1.0719871837	0.7028122449	2.8281536521	3.4490724343	3.5930970279	-0.7830095309	9.9363765484	0.2099801607	3.0034894747	0.4885047978	0.4117730090	0.1027065794	5.1420348236
0128-T_4_1	WITH	0.3151071025	0.7165863490	1.0124825838	1.3552775248	1.0903475299	2.7053765211	3.3009086208	2.9073819414	0.6677357978	15.6379303509	0.6478854350	3.9999170992	1.1058973881	0.4396745515	0.1886668920	0.4533163906
0130-T_4_1	WITH	0.3823830760	0.3674700048	0.5929474031	0.8640164243	0.7402277180	1.7575391543	2.0149344363	1.4195940224	0.6116269586	19.1191581658	0.6894422000	4.7555334453	0.8943063042	0.3734594326	0.1389947522	0.571547113
0132-T_4_1	WITH	0.4289662269	0.6332367644	1.0529483954	1.1174341609	1.2233925892	2.7030137260	2.9478690812	2.7651762820	1.0657789327	22.8815696883	1.0271788576	6.0892328368	1.4506780651	0.6079281293	0.2513145285	2.2615943644
0134-T_4_1	WITH	0.5639044247	0.6797639338	2.0152101553	1.8411999243	1.7727755703	2.6048145532	2.9225146961	2.4391633424	1.0224809929	18.7947567647	0.8090446267	4.0647507156	1.2722940384	0.6054313663	0.2049331743	0.4374917643
0144-T_4_1	WITH	0.0504316131	1.6791690882	1.4003715253	2.4352379305	1.3686382033	5.6231427203	6.4170922439	6.6186620998	1.1447453227	19.4475425981	0.6625471986	2.9907421232	2.6346667339	1.0285538112	0.3308773725	0.8353022975
0145-T_4_1	WITH	0.2484729719	0.4516867721	0.4423300172	2.1679020000	0.4533693858	1.7471524381	2.6533560621	1.8952790765	1.0145136524	25.9138539779	1.3060801762	4.8667620422	0.9952493653	1.4201285365	0.1601288122	2.2293843772
0146-T_4_1	WITH	0.3892176331	0.4459972479	0.6589731425	1.0314775785	0.3618643785	2.4712407592	1.3121533419	1.4800134494	0.7531084675	10.4051160732	0.7236511168	4.5041648825	0.8799887687	0.4524155404	0.1146263259	0.3837228809
0147-T_4_1	WITH	0.3697547668	0.7606278754	0.5287408000	1.2196656907	0.5069227873	2.2304458793	2.7433258940	2.1360983398	1.1899090690	23.5848152015	0.9281086496	5.0877838074	1.2960423169	0.8013444181	0.2430657823	2.0969369534
0149-T_4_1	WITH	0.5615423981	0.9015051481	0.8098267383	1.2502607294	0.5959659780	2.9247541135	1.8614778566	1.6934151873	0.8481360878	11.8338529378	0.8527763677	4.9936697535	1.1573658449	0.5958699576	0.2003350800	1.0461663917
0151-T_4_1	WITH	0.2480102318	0.4402689644	0.6139235902	0.8668396002	0.3081616363	2.2795268354	1.4157836159	1.5223666851	0.6391129504	11.2761059802	0.7896525049	4.7209783812	0.9090409234	0.4143580875	0.1153042355	0.5831732003
0156-T_4_1	WITH	0.2718605354	1.3962051629	0.8731202991	1.0152251444	0.5097848941	2.1780057352	2.4250134592	1.7983001313	-0.0069849835	10.6466557349	0.4950815103	2.9147829788	0.5093523076	0.4696485348	0.1313065089	4.6450365658
0157-T_4_1	WITH	0.1337696064	0.8327211318	1.0517447634	0.9592933287	1.3519150351	2.5316832690	0	1.7058642092	0.4614203700	18.1179281566	0.5481021198	6.4001457030	0.7931801577	0.4234529605	0.1578668635	3.6659279679
0161-T-_4_1	WITH	0.4064167871	0.7581145636	1.0293544902	1.4403426503	0.5814968817	3.5359165325	2.5515547772	1.9845098389	1.4288364620	14.1382288123	1.0551047513	3.9091586399	1.3925196697	0.9053201893	0.2894115221	0.6330332471
0163-T_4_1	WITH	0.1701226625	2.8500527064	0.9004345254	1.0129206965	0.8544063936	3.3281298307	1.9599856480	1.9316382392	-0.5871024265	6.3786292684	0.3326311042	2.9942989396	0.2604326110	0.9302365563	0.2018580630	8.2663630331
0169-T_4_1	WITH	0.2511502794	0.5363737349	0.5402110580	0.7426379856	0.3026174381	1.9449857356	9.2236355273	2.5908520372	0.6549983026	10.3496055110	0.6776511185	3.3345099488	0.8066712706	0.5272473185	0.1283202423	1.7254922504
0170-T_4_1	WITH	0.4956820991	0.5829790223	0.4037711657	0.9700063966	0.2309772448	2.0660178578	2.3227067439	1.6730819502	0.9544264947	10.5332542396	0.7734616422	3.4764381556	1.0089057023	0.5359175297	0.1572547300	1.0499061967
0172-T_4_1	WITH	0.4459134935	0.4701454454	0.4411753766	0.8901408775	0.3333978029	1.5686008146	1.5504520684	0.9166118400	0.6668462262	12.8198346831	0.6425589939	3.9994313747	0.7822428207	0.8083366882	0.2120457763	0.2406030628
0174-T_4_1	WITH	0.4504310295	0.8520547948	0.4531231988	0.9918298818	0.2698670367	2.1843001794	2.5164670404	1.5945507259	1.0784965274	14.2935149061	0.7151144046	4.0438205832	0.9148016834	0.5691198883	0.1352046989	1.3705579181
0177-T_4_1	WITH	0.3162609997	0.3562225131	0.3771670637	0.9228914585	0.3072273840	1.6420349976	1.5884720032	1.0732423533	0.7061306141	16.3758233165	0.8806442631	3.6347498661	0.7613335863	0.4155467859	0.1382510926	0.5181342706
0236-T_4_1	WITH	0.2992476728	0.9254484567	0.6458960969	1.8353714379	0.7258442858	2.7019394344	3.1177994349	2.2647019790	1.0246256981	21.0504749543	0.7526648716	3.3299169340	1.3746002740	0.7065051736	0.2444136792	0.5538124459
0238-T_4_1	WITH	0.5124750463	0.8769262350	0.8020160255	1.9574249138	0.6506283125	2.8772283713	2.5625086868	1.7169341556	1.8266165499	10.4798664585	1.3576844694	3.5577892089	1.6751695244	0.6422934976	0.2298728614	0.521191854

## Sheet: LongShort term survivors
Patients	WITHOUT neoadjuvant CT	Ascorbate	Aspartate	Choline	Creatine	Ethanolamine	Glutamate	Glycerol	Glycine	Gpcho	Lactate	Pcho	Taurine	Threonine	Glutamine	Succinate	Glucose
0019-T_4_1	LONG	0.5078426563	0.7686528314	0.8865430367	1.3687352053	0.6679026025	2.9955330630	2.6712871171	1.8530464473	1.0972765410	15.0422702501	0.8816354177	6.1010860799	1.2906043110	0.6606410084	0.1534957099	1.1526559487
0027-T_4_1	LONG	0.5052269984	1.0947991215	0.6067836286	1.1004770784	0.4094178828	2.5933959254	4.2834030884	3.3977252532	0.9578693417	12.6280193754	1.0675296699	6.9097218888	1.3609116229	0.6652316792	0.2243960634	4.7342358744
0097-T_4_1	LONG	0.2871802525	0.3950298527	0.8081171943	1.0036756234	0.6921472759	1.6431845590	2.9176415658	2.5700751401	0.8349094176	11.0081459914	0.6684649426	2.9824752866	0.9500975519	0.3470213714	0.1332730966	1.5082309469
0105-T_4_1	LONG	0.1344168748	0.6412825716	0.5362903389	0.8785656933	0.5186609832	1.8024427747	1.6698852285	1.3697205080	0.2584975268	12.3032431415	0.3197729924	3.1094461533	0.5365608660	0.3488414443	0.0459971816	1.4464654331
0155-T_4_1	LONG	0.2391322861	0.4862240581	0.6552628139	1.2985370355	0.4567637626	1.9724869825	1.9742598406	1.4579097504	1.1232334106	16.4456476336	0.6951471666	4.3811772189	0.9403155656	0.4827103573	0.1417376155	0.9073606485
0165-T_4_1	LONG	0.8900435068	0.7810563761	1.0254570075	1.3422829536	0.5964687425	3.4527437744	2.4052774643	2.1373793539	1.2171335811	17.2461910625	1.2716256929	6.3413081033	1.3812532621	0.7840413684	0.1542141060	1.036463747
0176-T_4_1	LONG	0.3150238036	0.3837403271	0.6012374489	0.7243573722	0.3117688627	1.4467037031	4.7544095963	1.2357303518	0.5494209372	10.0253458580	0.5289490083	4.1429731023	0.7576951626	0.4960719817	0.0796224146	0.3167255082
0240-T_4_1	LONG	0.2383847980	0.2647577293	0.3097048564	0.8871492681	0.1715147409	1.7393165391	1.3877912041	1.0232582665	0.6985502898	9.1015291660	0.5281665715	3.8842972170	0.6594754234	0.3219108152	0.1373556550	0.7741448911
0055-T_4_1	SHORT	0.3176404650	0.4774434201	1.1275000409	1.2354374254	0.7485309461	2.3217791621	2.1037685869	1.8253125872	2.1353555732	12.9725108134	0.7528227504	2.7995463709	1.1815505606	0.7308798616	0.1583507038	0.5890763424
0061-T_4_1	SHORT	0.5338859804	1.1494955413	1.0937764978	1.7749206413	0.8850121938	3.1850155873	2.3752607808	2.4912482889	1.5496130235	20.6503146822	1.1273083923	3.4960849384	1.6006155291	0.9339510090	0.1735142323	1.5163576614
0084-T_4_1	SHORT	0.1269834716	0.5097110048	0.9370832318	1.2156913960	0.8341837837	1.6967805119	2.5505985436	1.8241873990	0.6282215945	18.0185731252	0.8237148618	4.0915871119	0.9228028895	0.3994375210	0.0944812876	0.8617206603
0086-T_4_1	SHORT	0.2129914816	0.4934621646	1.0106773915	0.8649894712	1.0135790150	2.3336006869	2.2022066061	1.5516031646	0.6932485744	16.7426956466	0.6483712579	4.6569984604	1.0320638909	0.5941558913	0.1672774564	0.5677080194
0090-T_4_1	SHORT	0.4277875089	0.5649251817	0.8477337681	1.2831037779	0.8917101987	2.6268460811	2.4195499682	1.8068790545	0.9659371603	19.6749898448	1.0296596973	7.1838695556	1.3491965435	0.7992991099	0.2429554968	0.6525830596
0122-T_4_1	SHORT	0.3700112295	0.4675380620	0.5257547047	1.2602778795	0.9734335355	2.6471464311	3.5770894473	2.9653040463	0.9692517095	24.1546800506	0.8453366671	5.0301807010	1.2145758530	0.4898242071	0.3908834965	2.3433656154
0126-T_4_1	SHORT	0.2115934035	0.8408080050	1.6580980855	2.6215423919	1.1440977562	3.3594727694	5.9249955447	3.6859360785	0.4953243847	16.3992754526	0.6450542061	4.7961514067	1.1811717606	0.9319308897	0.2589180636	0.8371652689
0138-T_4_1	SHORT	0.0784159848	0.4483279654	1.0837798589	1.1299510649	0.8281829617	1.8075394643	1.7999123964	1.7795739188	0.3195018846	13.0610814587	0.2650125180	1.5797231766	0.7395730980	0.1777579099	0.0395520130	0.180472609
0142-T_4_1	SHORT	0.4228956475	0.5363684800	1.1145627707	1.3308721130	0.7894974791	2.7240736239	5.1033318634	4.1906371203	2.1113210649	11.0569164940	1.2465475192	2.3832750056	1.4428176076	0.7932518368	0.3016077093	2.0280443297
